# Supplementary material for: Efficient Co and GO co-doped TiO2 catalysts for the electrochemical reduction of nitrate to ammonia
Source: Royal Society of Chemistry journal article supplement (doi:10.1039/d4cy01228c), 2025-01-01
Supplement: d4cy01228c1.pdf [file d4cy01228c1.pdf]

## Supplementary Material

### Efficient Co and GO co-doped TiO<sub>2</sub> catalysts for the electrochemical reduction of nitrate to ammonia

Peiyan Lin <sup>a, b</sup>, Renhong Chen <sup>a</sup>, Sheng Xu <sup>a</sup>, Xia Xia <sup>a</sup>, Fang Zhao <sup>a</sup>, Xuefeng Ren <sup>a</sup>,  
Yumeng Lu <sup>a</sup>, Liguao Gao <sup>a</sup>, Junjiang Bao <sup>a,\*</sup>, Anmin Liu <sup>a,\*</sup>

<sup>a</sup> School of Chemical Engineering, Ocean and Life Sciences, Dalian University of  
Technology, Panjin 124221, China.

E-mail: [liuanmin@dlut.edu.cn](mailto:liuanmin@dlut.edu.cn); [baojj@dlut.edu.cn](mailto:baojj@dlut.edu.cn)

<sup>b</sup> Institute of Chemistry Chinese Academy of Sciences, Beijing, China.

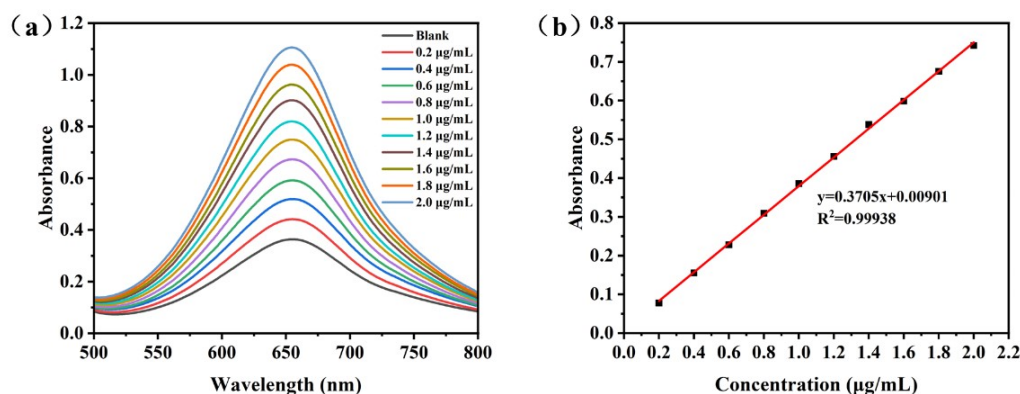

**Figure S1.** (a) UV-Vis absorption spectra of indophenol assays kept with different concentrations of  $\text{NH}_4^+$  after incubation for 1 h at room temperature. (b) Calibration curve used for estimation of  $\text{NH}_4^+$  concentration.

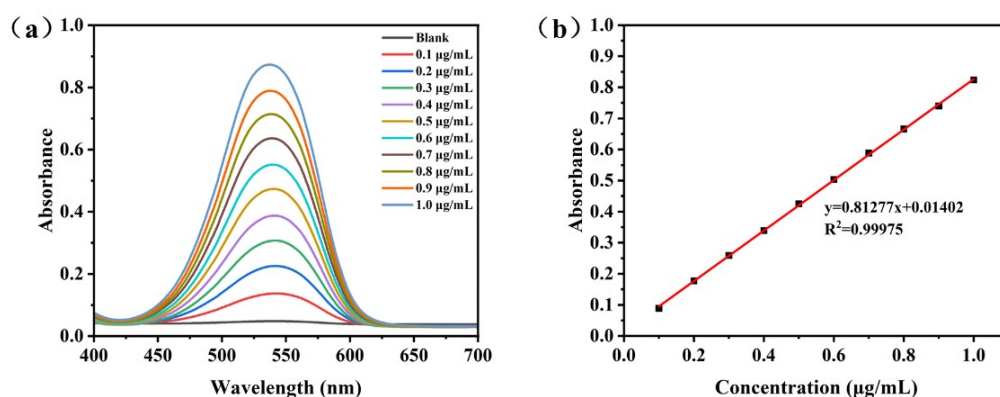

**Figure S2.** (a) UV-Vis absorption spectra of indophenol assays kept with different concentrations of  $\text{NO}_2^-$  after incubation for 1 h at room temperature. (b) Calibration curve used for estimation of  $\text{NO}_2^-$  concentration.

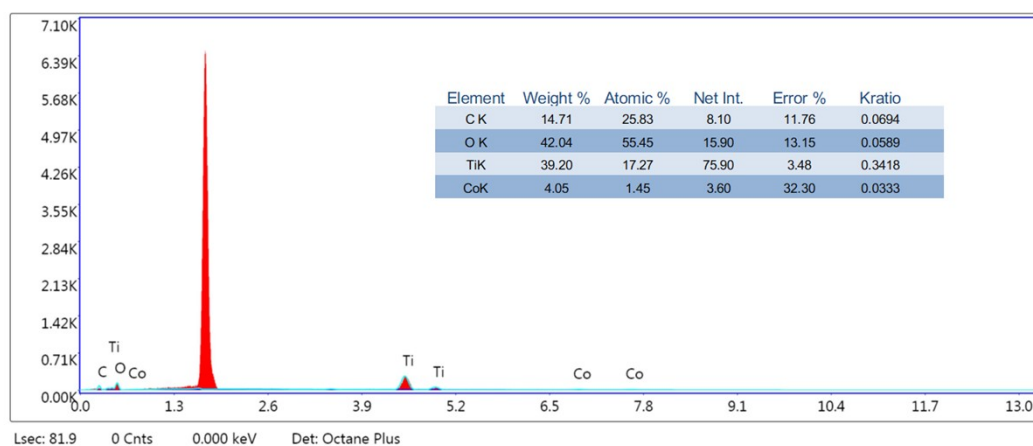

**Figure S3.** Total EDX spectra and eZAF intelligent quantization results of Co-TiO<sub>2</sub>/GO.

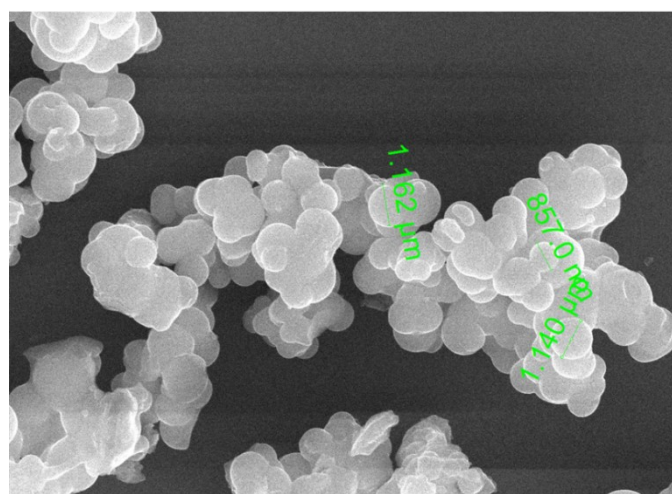

**Figure S4.** SEM image of TiO<sub>2</sub>/GO.

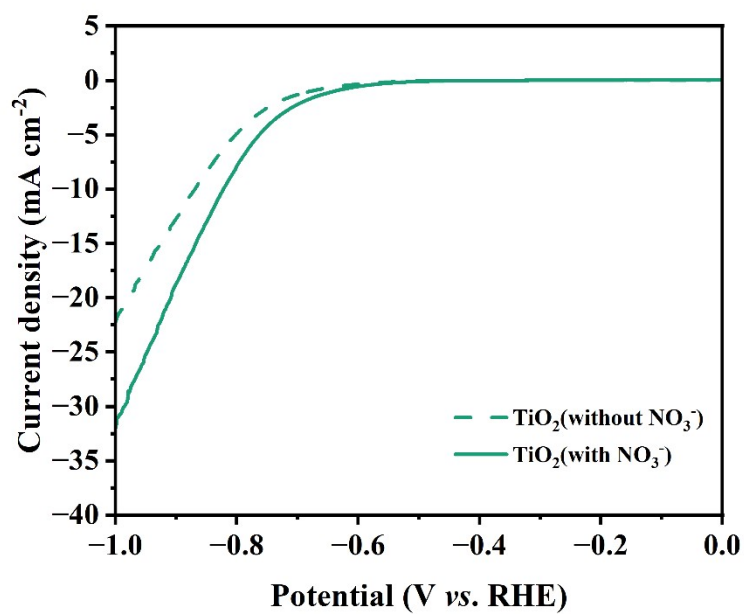

**Figure S5.** LSV curves of  $\text{TiO}_2$  in 0.1 M KOH with and without 0.1 M  $\text{NO}_3^-$ .

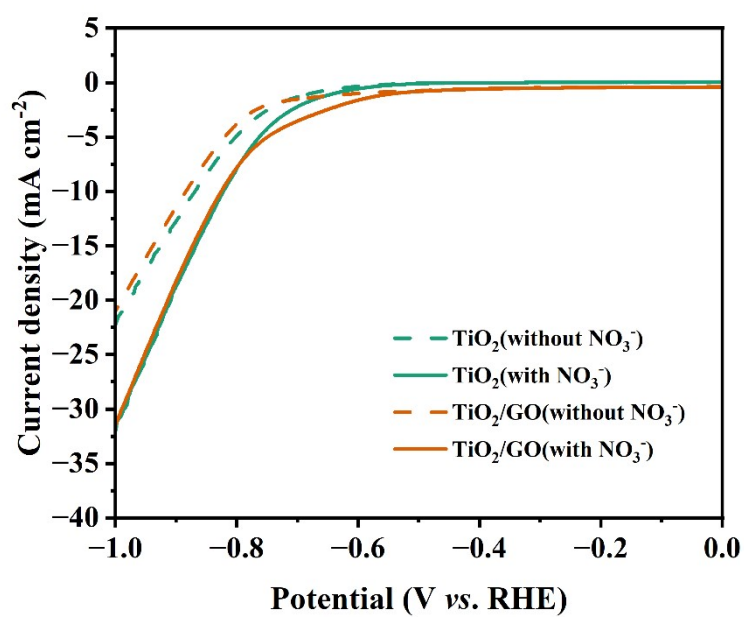

**Figure S6.** LSV curves of  $\text{TiO}_2$  and  $\text{TiO}_2/\text{GO}$  tested in 0.1M KOH electrolyte with or without 0.1M  $\text{KNO}_3$ .

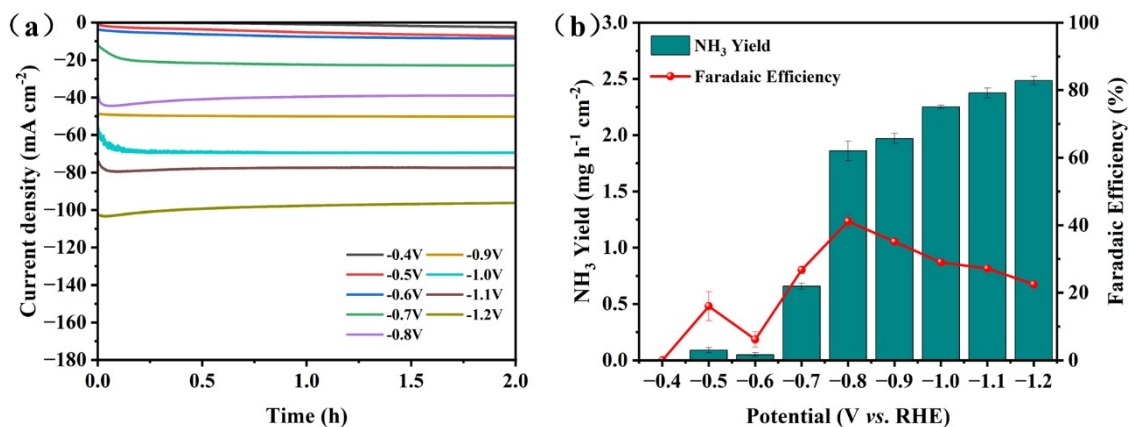

**Figure S7.** (a) CA curve of Co-TiO<sub>2</sub> at different potentials. (b) NH<sub>3</sub> yield and FEs of Co-TiO<sub>2</sub> at each given potential.

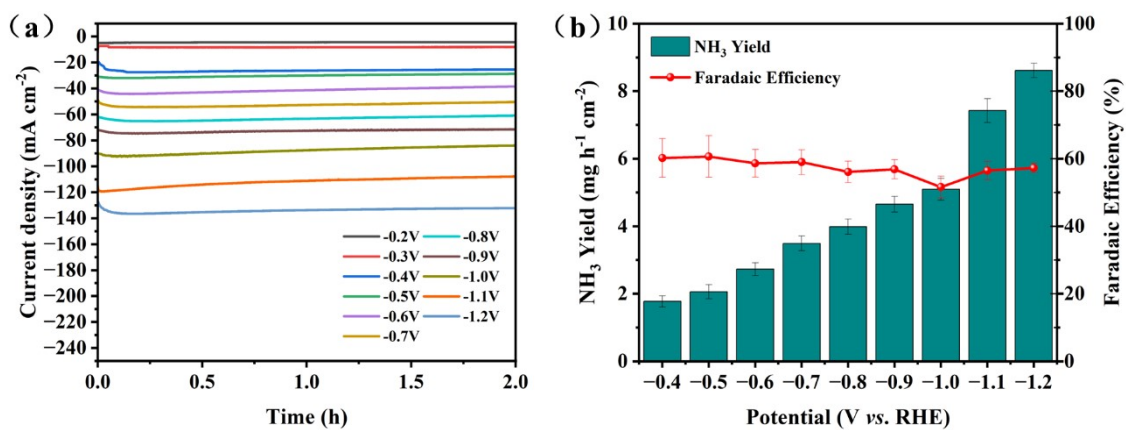

**Figure S8.** (a) CA curve of Co-TiO<sub>2</sub>/GO at different potentials. (b) NH<sub>3</sub> yield and FEs of Co-TiO<sub>2</sub>/GO at each given potential.

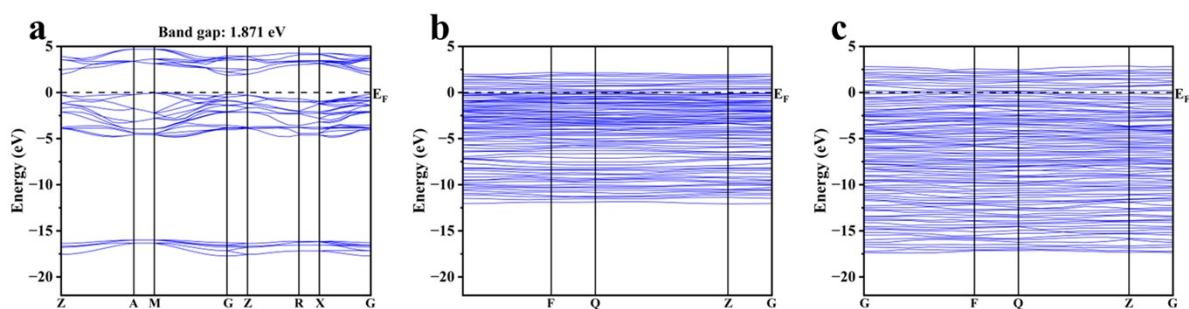

**Figure S9.** (a) TiO<sub>2</sub> (b) Co-TiO<sub>2</sub> and (c) Co-TiO<sub>2</sub>/GO band structure diagram.
